# Supplementary material for: Consumption of ultra-processed foods and breast density in adolescence
Source: Research Square preprint supplement (doi:10.21203/rs.3.rs-6506100/v1), 2025-05-20
Supplement: Supplementary file 1 [file 20c555376870d859b711347f.docx]

**Consumption of ultra-processed foods and breast density in adolescence**

Angela Devoto C1, María Luisa Garmendia1, Marcela Jacard2, 3, **Ana Pereira S1**

1 Institute of Nutrition and Food Technology, University of Chile, Avda. El Líbano 5524, Macul, Santiago, Chile

2 Department of Digital Health, Ministry of Health, Chile

3 Radiology Department, Clínica Alemana de Santiago, Chile

**Supplementary material**

Table S1: Comparison of sociodemographic and gynecological characteristics of the included girls (n=330) in the study vs the excluded (n=273)

| Variables | Girls included (n=330) | Girls excluded (n=272) | p-value * |
| --- | --- | --- | --- |
| Birth weight (kg), average (SD) | 3.36 (0.42) | 3.37 (0.41) | 0.77 |
| BMI z score at 4 years post menarche, average (SD) | 0.92 (1.03) | 0.91 (1.13) | 0.92 |
| Age at menarche (years), average (SD) | 11.8 (0.85) | 12.18 (1.19) | <0.05 |
| Maternal education, n (%)  > 12 years  ≤ 12 years | 83 (25.3)  245 (74.7) | 43 (21.29)  159 (78.71) | <0.05 |
| Abbreviations: BMI, body mass index; SD, standard deviation.  * comparison between included and excluded girls, using the T-student or χ2 test, as appropriate. | | | |
